# Supplementary material
Source: PubMed Central journal article supplement (PMC10122005)
Supplement: mmc1.pdf [file mmc1.pdf]

**Supplementary Table 1:** Coverage Characteristics of Patients without Private Insurance  
Coverage Information for Patients Classified as Lacking Private Insurance

| Coverage Type                            | n   |
|------------------------------------------|-----|
| Uninsured                                | 101 |
| Medicaid                                 | 58  |
| Medicare                                 | 106 |
| Medicare with Medicaid eligibility       | 34  |
| Veterans Affairs/TRICARE                 | 22  |
| Unspecified Public Health Service        | 135 |
| Total Patients without Private Insurance | 456 |

**Supplementary Table 2:** Multivariate Analysis of Cachexia Incidence at Cancer Diagnosis Excluding Private Insurance Covariate

| Category                     | Parameter                         | Odds ratio (95% CI) | P value |
|------------------------------|-----------------------------------|---------------------|---------|
| <b>Patient information</b>   | <b>Age at diagnosis (years)</b>   | 1.004 (0.989-1.020) | 0.5675  |
|                              | <b>Female Sex</b>                 | 0.703 (0.512-0.964) | 0.0287  |
|                              | <b>Race</b>                       |                     |         |
|                              | Non-Hispanic White                | -                   | 0.0089  |
|                              | Black                             | 1.748 (1.205-2.535) | 0.0033  |
|                              | Asian                             | 0.907 (0.454-1.811) | 0.7816  |
|                              | Hispanic                          | 1.717 (1.005-2.932) | 0.0477  |
| <b>Risk factors</b>          | <b>Charlson comorbidity score</b> | 1.003 (0.953-1.056) | 0.8953  |
|                              | <b>Pretreatment BMI</b>           | 0.979 (0.953-1.005) | 0.1166  |
|                              | <b>Alcohol history</b>            | 0.992 (0.719-1.368) | 0.9588  |
|                              | <b>Tobacco history</b>            | 1.63 (1.061-2.503)  | 0.0257  |
| <b>Tumor characteristics</b> | <b>Histology</b>                  |                     |         |
|                              | Adenocarcinoma                    | -                   | 0.2591  |
|                              | Squamous                          | 1.401 (0.928-2.116) | 0.1084  |
|                              | Large Cell                        | 1.279 (0.429-3.815) | 0.6591  |
|                              | Mixed/NOS                         | 1.456 (0.869-2.439) | 0.1539  |

**Supplementary Table 3:** Non-Parametric Kruskal-Wallis Testing Comparing Age at Diagnosis Across Race/Ethnicity Groups

| Comparison groups              | Test statistic ± standard error | P value <sup>a</sup> |
|--------------------------------|---------------------------------|----------------------|
| Asian vs Black                 | 7.965 ± 37.597                  | 1.0000               |
| Asian vs Hispanic              | -29.233 ± 43.684                | 1.0000               |
| Asian vs non-Hispanic White    | 89.681 ± 34.525                 | 0.0563               |
| Black vs Hispanic              | -21.268 ± 34.663                | 1.0000               |
| Black vs non-Hispanic White    | 81.716 ± 22.028                 | 0.0012               |
| Hispanic vs non-Hispanic White | 60.448 ± 31.304                 | 0.3209               |

<sup>a</sup>Significance of values adjusted by Bonferroni correction for multiple tests

**Supplementary Table 4:** Independent-Samples T-Test Comparing Age at Diagnosis of Black vs non-Hispanic (NH) White Patients

| Race               | n   | Average age at diagnosis (years) | Standard deviation | T value | P value |
|--------------------|-----|----------------------------------|--------------------|---------|---------|
| Non-Hispanic White | 579 | 65.64                            | 10.38              | 3.7655  | 0.0002  |
| Black              | 216 | 62.60                            | 9.44               |         |         |

**Supplementary Table 5:** Median Survival Times for Black vs non-Hispanic (NH) White Patients stratified by Cachexia Status at Diagnosis

| Group                 | Median survival (days), 95% CI |
|-----------------------|--------------------------------|
| No cachexia, NH White | 471, 375-567                   |
| No cachexia, Black    | 497, 322-672                   |
| Cachexia, NH White    | 259, 198-320                   |
| Cachexia, Black       | 210, 147-273                   |
| Overall               | 339, 282-396                   |

**Supplementary Table 6:** Log-Rank Comparisons Black vs non-Hispanic (NH) White Patients Stratified by Cachexia Status at Diagnosis

| Differing variable     | Comparison groups                           | P value |
|------------------------|---------------------------------------------|---------|
| <b>Race</b>            | No cachexia, Black vs No cachexia, NH White | 0.5121  |
|                        | Cachexia, Black vs Cachexia, NH White       | 0.2744  |
| <b>Cachexia Status</b> | Cachexia, NH White vs No cachexia, NH White | 0.0096  |
|                        | Cachexia, Black vs No cachexia, Black       | 0.0022  |
